# Supplementary material
Source: PubMed Central journal article supplement (PMC4416661)
Supplement: i1552-5783-56-4-2737-s01.pdf [file i1552-5783-56-4-2737-s01.pdf]

## Supporting Information

### Table S1: Predicted Effects of Tag SNPs and Variants in LD ( $r^2 \geq 0.8$ ) on Transcription

#### Factor Binding Motifs

The lead SNPs identified in this study are colored in red.

**Name:** dbSNP identifier of the GWAS hit.

**Factor:** name of the PWM of the proposed effect. PWMs from Factorbook<sup>53</sup> are subscripted `_FACTOR` (or lack a subscript, e.g. "UA8"); all others are from HOCOMOCO. The HOCOMOCO subscripts reflect models used to derive the PWMs as described.<sup>54</sup>

**Match:** the exact sequence of the genomic DNA around the SNP that is proposed to match the PWM.

**SNV.pos** (single nucleotide variant position): indicates the position of the SNP within the matched DNA sequence in the preceding column.

**Strand:** the + or - strand of the PWM match with respect to the reference genome.

**Variant:** the identity of the nucleotide variant reference and alternate alleles, presented as reference-->alternate.

**Refpct:** the percent of maximum PWM score assessed on the reference version of the genome given by the column "match".

**Varpct:** the percent of maximum PWM score assessed on the alternate SNP value of the genome if the Variant is substituted on the Match.

**Refsnp.val:** the frequency of the reference nucleotide within the PWM centered on the match sequence.

**Varsnp.val:** the frequency of the alternative nucleotide within the PWM centered on the match sequence. Note that Refsnp.val and Varsnp.val do not sum to 1 because a binary SNP represents only 2 of the 4 frequencies at each position. At each position of the PWM, frequencies of the four nucleotides (A, C, T, G) sum to 1.0.

**Effect:** indicates whether the alternate version improves upon or disrupts the reference match.

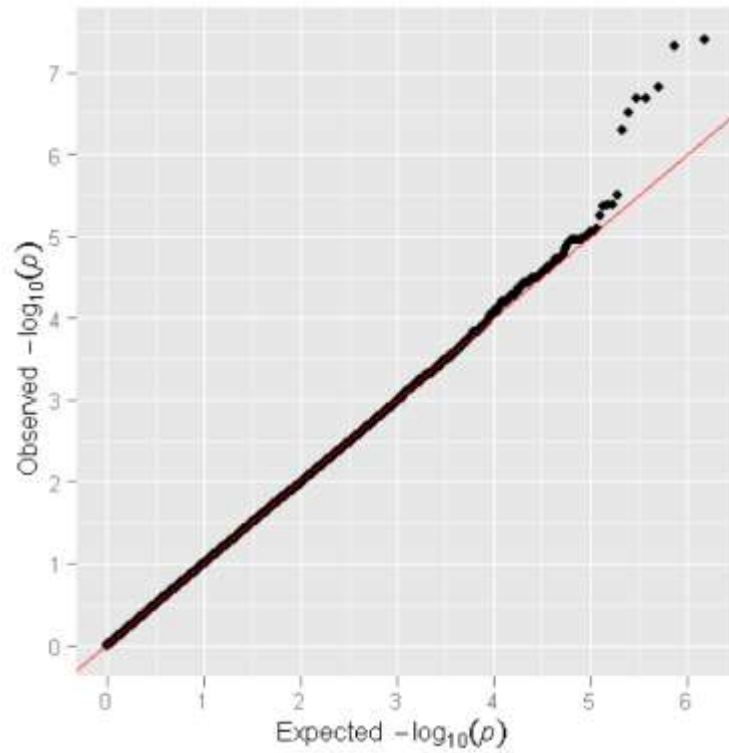

**Figure S1: Q-Q plot**

Q-Q plot showing the distribution of the observed P values from the logistic regression analysis for the GWAS scan against the expected distribution under the null hypothesis.
